# Supplementary material for: A Sensitive In Vitro Approach to Assess the Hybridization-Dependent Toxic Potential of High Affinity Gapmer Oligonucleotides
Source: PubMed Central journal article supplement — Mol Ther Nucleic Acids. 2017 Nov 14;10:45–54. doi: 10.1016/j.omtn.2017.11.004 (PMC5725219; doi:10.1016/j.omtn.2017.11.004), 2017-11-14
Supplement: mmc2.pdf [file mmc2.pdf]

# A Sensitive *In Vitro* Approach to Assess the Hybridization-Dependent Toxic Potential of High Affinity Gapmer Oligonucleotides

Andreas Dieckmann,<sup>1,3</sup> Peter H. Hagedorn,<sup>2,3</sup> Yvonne Burki,<sup>1</sup> Christine Brüggemann,<sup>1,4</sup> Marco Berrera,<sup>1</sup> Martin Ebeling,<sup>1</sup> Thomas Singer,<sup>1</sup> and Franz Schuler<sup>1</sup>

<sup>1</sup>Roche Pharma Research and Early Development, Roche Innovation Center Basel, 4070 Basel, Switzerland; <sup>2</sup>Roche Pharma Research and Early Development, Roche Innovation Center Copenhagen, 2970 Hørsholm, Denmark

**The successful development of high-affinity gapmer antisense oligonucleotide (ASO) therapeutics containing locked nucleic acid (LNA) or constrained ethyl (cEt) substitutions has been hampered by the risk of hepatotoxicity. Here, we present an *in vitro* approach using transfected mouse fibroblasts to predict the potential hepatic liabilities of LNA-modified ASOs (LNA-ASOs), validated by assessing 236 different LNA-ASOs with known hepatotoxic potential. This *in vitro* assay accurately reflects *in vivo* findings and relates hepatotoxicity to RNase H1 activity, off-target RNA downregulation, and LNA-ASO-binding affinity. We further demonstrate that the hybridization-dependent toxic potential of LNA-ASOs is also evident in different cell types from different species, which indicates probable translatability of the *in vitro* results to humans. Additionally, we show that the melting temperature ( $T_m$ ) of LNA-ASOs maintained below a threshold level of about 55°C greatly diminished the hepatotoxic potential. In summary, we have established a sensitive *in vitro* screening approach for assessing the hybridization-dependent toxic potential of LNA-ASOs, enabling prioritization of candidate molecules in drug discovery and early development.**

## INTRODUCTION

For nearly 40 years, antisense oligonucleotides (ASOs) have been researched and refined to modify target gene expression. Recently, three ASOs with drug-like properties received approvals, and more than 100 ASOs are currently in clinical development.<sup>1</sup> An ongoing challenge in ASO development is the optimization of the ASO design to ensure adequate patient safety. ASOs have known potential safety liabilities, recently reviewed by Chi et al.,<sup>2</sup> which mainly involve (1) hybridization-independent binding of ASOs to cellular proteins, thereby interfering with their biological function and/or (2) hybridization-dependent downregulation of unintended target RNAs, thereby reducing the level of potentially essential proteins or regulatory RNAs. Following *in vivo* administration, ASOs mainly accumulate in the kidney and liver, where ASO-mediated toxicity is typically observed.<sup>3</sup>

Some 2'-sugar modifications, including locked nucleic acid (LNA) and constrained ethyl (cEt) substitutions, significantly increase the binding affinity of RNase H1-activating gapmer ASOs, i.e., ASOs containing a central deoxynucleotide region flanked on both ends by several modified ribonucleotides. Short (12–16 nt long) gapmer ASOs with LNA or cEt nucleotides in the flanks tend to exhibit higher potency than longer oligonucleotides built with lower-affinity chemistry.<sup>1</sup> This shorter ASO design could enhance *in vivo* delivery and further mitigate some typical class effects of ASOs containing stability- and protein binding-increasing phosphorothioate (PS) backbone modifications.<sup>1,2</sup> Despite these advantages, ASOs with high-affinity modifications have been associated with a higher risk of inducing liver toxicity.<sup>4–12</sup> Recent *in vivo* data suggest that the observed hepatotoxicity is hybridization dependent and requires RNase H1 activity.<sup>10,12</sup> Furthermore, the affinity of an ASO is considered to be associated with its hepatotoxic potential, likely because high-affinity ASOs can bind to and mediate cleavage of more unintended target RNAs than lower affinity ASOs.<sup>10–13</sup>

Although our understanding of hybridization-dependent ASO toxicity is increasing, there are only a few reported *in silico* and/or *in vitro* approaches to predict this *in vivo* liability.<sup>6,11–15</sup> Although *in silico* methods can identify putative off-target sequences,<sup>11,13</sup> setting tolerable thresholds to minimize false positive off-target predictions remains difficult. Thus, *in silico* approaches can markedly reduce, but not eliminate, the risk of selecting oligonucleotides with hybridization-dependent toxicities.<sup>16</sup> To assess this remaining risk, ASOs are routinely tested in animals (typically mice) or, as recently reported, primary mouse and human hepatocytes for their hepatotoxic potential.<sup>14</sup>

Received 5 July 2017; accepted 11 November 2017;  
<https://doi.org/10.1016/j.omtn.2017.11.004>.

<sup>3</sup>These authors contributed equally to this work.

<sup>4</sup>Present address: BioNTech AG, 55131 Mainz, Germany

**Correspondence:** Andreas Dieckmann, PhD, Roche Innovation Center Basel, Grenzachstrasse 124, 4070 Basel, Switzerland.

**E-mail:** [andreas.dieckmann@roche.com](mailto:andreas.dieckmann@roche.com)

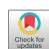

**Table 1. Structures and Key Data of Initial Set of Tool LNA-ASOs**

| LNA-ASO Name | LNA-ASO Sequence | Target RNA   | Target Species | ALT Increase Relative to Control | Hepatotoxic | $T_m$ (°C) |
|--------------|------------------|--------------|----------------|----------------------------------|-------------|------------|
| LNA32        | EAAaggaacacaEAT  | <i>Myd88</i> | mouse, rat     | 1.09                             | no          | 44.5       |
| LNA33        | EAAatgctgaacTAT  | <i>Myd88</i> | mouse          | 1.02                             | no          | 44.0       |
| LNA39        | GTEagaaacaaccAEE | <i>Myd88</i> | mouse, rat     | 1.06                             | no          | 51.4       |
| LNA41        | EAEattcctgctETG  | <i>Myd88</i> | mouse, human   | 44.57                            | yes         | 57.2       |
| LNA37        | GEEtcccagttccTTT | <i>Myd88</i> | mouse, rat     | 41.54                            | yes         | 64.3       |
| LNA43        | GATgcctcccaGTT   | <i>Myd88</i> | mouse, rat     | 36.48                            | yes         | 55.9       |

Capital letters: LNA; small letters: DNA; E, 5-methylcytosin; all LNA-ASOs were fully phosphorothioated. The LNA-ASOs were designed to target *Myd88*, with some also targeting rat *Myd88* or human *MYD88*, as indicated. ALT levels were determined 2 weeks after i.v. treatment of mice with  $5 \times 15$  mg/kg.<sup>6</sup> ALT levels are expressed as fold change relative to saline-treated animals. The theoretically calculated melting temperatures ( $T_m$ s) are indicated.

Here, we investigated whether the hepatotoxic potential of LNA-ASOs can also be assessed employing conventional tissue culture cells and methods. Applying lipotransfection for efficient nuclear delivery of 236 LNA-ASOs, we observed a clear association between induction of apoptosis in mouse 3T3 fibroblast cells *in vitro* and LNA-ASO hepatotoxicity determined *in vivo* in mice. Moreover, using the *in vitro* assay, we accurately reproduced recent mechanistic *in vivo* findings in relation to hybridization-dependent hepatotoxicity.<sup>10,12</sup> The cytotoxic properties of hepatotoxic LNA-ASOs also manifested in tumor-derived human tissue culture cell lines. These findings imply a general cytotoxic—rather than a cell-type-specific toxic—effect of certain high-affinity ASOs. Finally, our data suggest a relationship between the calculated melting temperature ( $T_m$ ) of LNA-ASOs and their hepatotoxic potential.

## RESULTS

### Apoptosis Induction in Mouse 3T3 Fibroblast Cells Differentiates Hepatotoxic from Well-Tolerated LNA-ASOs

Recently, Sewing et al.<sup>14</sup> demonstrated that unassisted (gymnotic) delivery of LNA-ASOs into primary mouse and human hepatocytes can discriminate hepatotoxic from well-tolerated LNA-ASOs by various readouts, including apoptosis. Assuming hybridization- and RNase-H-1-dependent mechanisms underlying hepatotoxicity, we hypothesized that this oligonucleotide-mediated toxicity may be evident in other cell types following efficient entry of the oligonucleotides into the cell's nucleus. Thus, we used Lipofectamine 2000 for nuclear delivery of LNA-ASOs into mouse 3T3 fibroblast cells and assessed apoptosis 24 hr later. As initial tool molecules, we selected six LNA-ASOs targeting mouse “Myeloid differentiation primary response 88” (*Myd88*) RNA (Table 1), of which three were known to be hepatotoxic and three were well-tolerated based on alanine aminotransferase (ALT) levels determined after 2 weeks of treatment with  $5 \times 15$  mg/kg in mice.<sup>6</sup> As evident from Figure 1, the hepatotoxic LNA-ASOs showed a concentration-dependent increase in caspase activity, whereas the well-tolerated LNA-ASOs did not markedly induce caspase activity at any tested concentration when compared to untreated cells (UTCs).

To extend this observation and rule out any transfection or target-related toxicity, an additional 230 LNA-ASOs were tested in the

*in vitro* assay at a fixed concentration of 100 nM. These 236 LNA-ASOs were designed to target 13 different genes and had all been evaluated in mice ( $n = 5$ ) for their hepatotoxic potential.<sup>6</sup> LNA-ASOs with a demonstrated lower hepatotoxic liability (i.e., mean ALT  $\leq 5$ -fold change relative to saline-treated mice<sup>6</sup>) induced significantly lower caspase activities ( $p$  value =  $5.4 \times 10^{-12}$  by Wilcoxon rank sum test) than LNA-ASOs with a higher hepatotoxic liability (i.e., mean ALT  $>5$ -fold change relative to saline-treated mice<sup>6</sup>) (Figure 2).

### Apoptosis Induction by Hepatotoxic LNA-ASOs *In Vitro* Is RNase H1 Dependent

Recently, it was demonstrated *in vivo* that oligonucleotide-mediated downregulation of RNase H1 expression in mouse liver suppressed hepatotoxicity of certain high-affinity ASOs.<sup>10,12</sup> To assess whether our *in vitro* assay also reproduces this finding, we pre-transfected mouse 3T3 fibroblast cells with a small interfering RNA (siRNA) against RNase H1 and a non-targeting control siRNA, respectively. Similar to the reported *in vivo* finding,<sup>10,12</sup> apoptosis was strongly suppressed when the hepatotoxic LNA41 or LNA37 were transfected into cells pre-transfected with a siRNA against RNase H1 but not with the control siRNA (Figure 3A). The siRNA-mediated downregulation of RNase H1 was confirmed by qPCR (Figure 3B).

### 2'-OMe Modifications in the Gap Region of Hepatotoxic LNA-ASOs Suppress Toxicity *In Vitro*

Substitution of several unmodified DNA nucleotides in the gap region with 2'-sugar modifications of hepatotoxic LNA-ASOs has recently been shown to interfere with RNase H1 activity, resulting in reduced hepatotoxicity in mice compared to the parent ASOs.<sup>10,12</sup> To investigate whether this finding can also be observed in our *in vitro* system, we substituted DNA nucleotides in the gap region of hepatotoxic LNA41 and LNA37 with two (resulting in LNA41' and LNA37') and ten (resulting in LNA41'' and LNA37'') 2'-O-methyl (2'-OMe)-modified ribonucleotides, respectively. Similar to reported *in vivo* findings, 2'-OMe gap modifications strongly suppressed the toxic potential of hepatotoxic LNA-ASOs also *in vitro*. As evident from Figure 4, caspase activity induced by LNA41 and LNA37 was potentially suppressed when the DNA gap region of the ASOs was completely modified with ten 2'-OMe-modified ribonucleotides (i.e., LNA41'' and LNA37''). Two

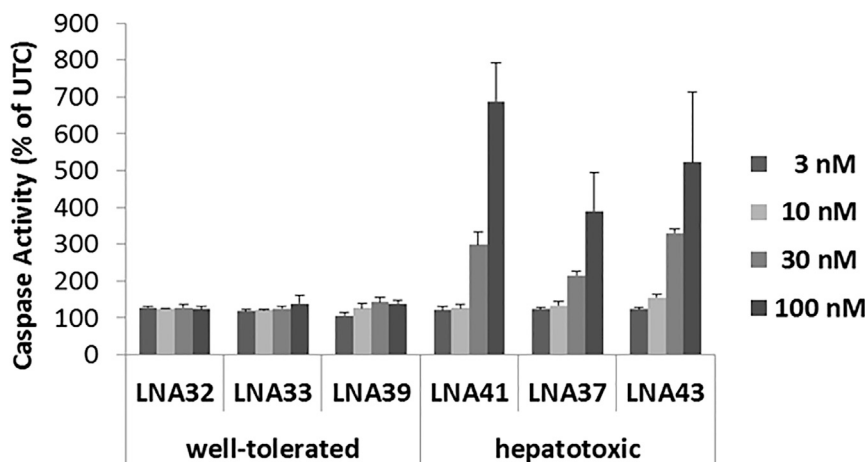

**Figure 1. Apoptosis Induction *In Vitro* Reveals the Hepatotoxic Potential of LNA-ASOs**

Mouse 3T3 fibroblast cells were transfected using Lipofectamine 2000 with well-tolerated and hepatotoxic LNA-ASOs, respectively. Caspase 3/7 activity was measured 24 hr later. Triplicate transfections were performed; the results are shown as a percentage change relative to UTCs. Data are mean  $\pm$  SD.

2'-OMe gap modifications in LNA37' were sufficient to suppress caspase values to similar levels as the fully 2'-OMe gap-modified LNA37'. In contrast, the two 2'-OMe gap modifications in LNA41' seemed to suppress caspase activity less potently but still considerably.

#### 2'-OMe Modifications in the Gap Region of Hepatotoxic LNA-ASOs Suppress Downregulation of Their Intended Target Sequence

To assess the impact of 2'-OMe modifications in the gap region of LNA41 and LNA37 on their downregulatory potential, we determined *Myd88* expression by qPCR 24 hr after transfection of the different LNA-ASOs into mouse 3T3 fibroblast cells (Figure 5). Complete modification of the gap region with ten 2'-OMe ribonucleotides in LNA41' and LNA37' potently abrogated *Myd88* downregulation. Consistent with the above experiment (see Figure 4), two 2'-OMe gap modifications were sufficient to potently suppress LNA37'-mediated downregulation of *Myd88* expression, whereas the downregulatory potential of LNA41' was only slightly affected by the two 2'-OMe gap modifications.

#### Gene Expression Analysis Suggests an Association between Apoptosis Induction *In Vitro* and the Number of Genes Downregulated by a Hepatotoxic LNA-ASO

For further insight into the apoptosis-inducing mechanisms of hepatotoxic LNA-ASOs, we investigated gene expression changes following *in vitro* transfection of a hepatotoxic LNA-ASO (LNA41) and its less toxic 2'-OMe-gap-modified version (LNA41'), respectively, into 3T3 cells. Cells were harvested at 3 and 6 hr after transfection, respectively, to preferentially capture direct off-target effects as opposed to secondary downstream effects. Gene array analysis was performed considering only genes for analysis that were at least 2-fold downregulated at the 6-hr time point. Using these settings, 293 genes were found to be significantly downregulated by the parent LNA41, whereas only 78 of these genes were also affected by the partial gap-modified LNA41' (Figure 6A). For most of the affected genes, the downregulatory effect was already evident at 3 hr. In line with recent *in vivo* data,<sup>10-12</sup> pathway analysis suggested that none of the downregulated off-target transcripts could unequivocally be associated with

apoptosis (data not shown). In accordance with the *Myd88* qPCR data (Figure 5), the partial gap modification affected the on-target (*Myd88*) downregulatory potential of LNA41' only modestly (Figure 6A; red dashed ovals). LNA41 also significantly upregulated 60 genes at 6 hr, whereas gap-modified LNA41' induced

only seven of these genes (Figure 6B). As with the downregulated genes, this effect was already evident at 3 hr for most of the upregulated genes. Several genes upregulated by toxic LNA41 were genes associated with cellular stress and, in particular, with apoptosis, including *Bcl2l11*,<sup>17</sup> *Gadd45a*,<sup>18</sup> *Trp53inp1*,<sup>19</sup> and *Cdkn1a*<sup>20</sup> (Table S2).

#### Apoptosis Induction *In Vitro* and Hepatotoxicity Observed *In Vivo* Associate with the Binding Affinity of LNA-ASOs

Increasing evidence indicates that the binding affinity of an ASO is associated with its hepatotoxic potential.<sup>10-12</sup> An ASO's binding affinity can be characterized by the  $T_m$ , which is the temperature at which half of the target RNA-DNA oligonucleotide duplexes dissociate to their single stranded form under standard conditions. The  $T_m$  can be determined experimentally,<sup>21</sup> or, as done in the present study, can be predicted using a nearest-neighbor algorithm with experimentally determined thermodynamic parameters.<sup>22</sup> The three well-tolerated *Myd88*-targeting LNA-ASOs all had a calculated  $T_m < 52^\circ\text{C}$ , whereas the toxic *Myd88*-targeting LNA-ASOs all had a  $T_m > 55^\circ\text{C}$  (Table 1). To explore this potential association further, we calculated the theoretical  $T_m$  for the additional 230 LNA-ASOs used in the assessment above. When all 236 LNA-ASOs were grouped into well-tolerated (i.e., mean ALT levels  $\leq 5$ -fold from saline-treated mice) and hepatotoxic LNA-ASOs (i.e., mean ALT levels  $> 5$ -fold from saline-treated mice), the hepatotoxic LNA-ASOs had a significantly ( $p$  value =  $7.9 \times 10^{-5}$ ) higher  $T_m$  (median  $T_m = 57.1^\circ\text{C}$ ) than the well-tolerated LNA-ASOs (median  $T_m = 54.2^\circ\text{C}$ ) (Figure 7A). Next, the caspase values determined *in vitro* for the different LNA-ASOs were analyzed relative to the calculated  $T_m$ s. The 236 LNA-ASOs were grouped into different  $T_m$  ranges and the respective caspase values for each range were listed in a boxplot diagram. Figure 7B shows a clear association between the different  $T_m$  ranges and the respective caspase values determined *in vitro*.

#### $T_m$ Calculations Aid the Design of LNA-ASOs with Low *In Vitro* Toxic Potential

To investigate whether the above findings can be used to design well-tolerated LNA-ASOs, we designed 10 LNA-ASOs with a  $T_m < 50^\circ\text{C}$ . As a control, we also designed 10 LNA-ASOs with a  $T_m > 60^\circ\text{C}$

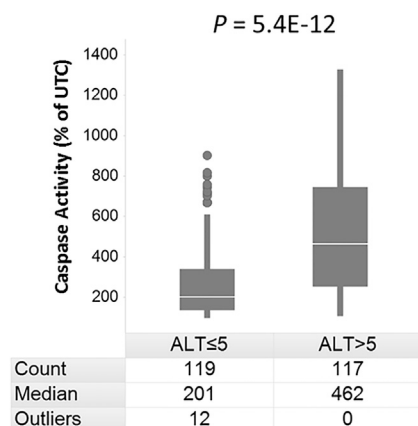

**Figure 2. *In Vitro* Caspase 3/7 Induction Is Stronger for Hepatotoxic Than for Well-Tolerated LNA-ASOs**

Mouse 3T3 fibroblast cells were transfected using Lipofectamine 2000 with 236 different LNA-ASOs at 100 nM. Caspase 3/7 activity was measured 24 hr later. Duplicate transfections were performed, and the values were calculated as average percentage change relative to UTCs. The LNA-ASOs were separated into two groups of lower and higher hepatotoxicity *in vivo* (i.e., mean ALT levels  $\leq 5$ -fold or  $> 5$ -fold, respectively, relative to saline-treated mice after intravenous (i.v.) treatment with  $5 \times 15$  mg/kg LNA-ASOs<sup>6</sup>). Each group of LNA-ASOs is listed versus their respective caspase values determined *in vitro* in a boxplot diagram. For each group, the number (count) of included LNA-ASOs, the median caspase activities, and the number of outliers is shown. The level of significance as evaluated by Wilcoxon rank sum test is indicated above the boxplot.

(presented in Table S1). All ASOs targeted mouse glyceraldehyde 3-phosphate dehydrogenase (*Gapdh*) and were subjected to the 3T3 caspase assay. As evident from Figure 8, 80% of the LNA-ASOs with a  $T_m < 50^\circ\text{C}$  displayed low caspase values (i.e.,  $< 200\%$  of UTC), whereas only 20% of the LNA-ASOs with a  $T_m > 60^\circ\text{C}$  were within this lower caspase range ( $p$  value = 0.005).

### Modulating the Toxic Potential of an LNA-ASO by Tuning Its Binding Affinity

The data so far suggest that binding affinity is a major determinant for hybridization-dependent oligonucleotide toxicity. Therefore, we speculated that reducing the binding affinity of a toxic LNA-ASO should consequently reduce its toxicity. To test this, we used the toxic mGAPDH\_LNA1189 from the previous experiment (see Figure 8 and Table S1). We changed the number and position of high-affinity LNA modifications in the wings of mGAPDH\_LNA1189 while keeping the length and sequence constant. To maintain protection from nucleases, we substituted only the middle LNA modifications in the wings with DNA nucleotides. The different substitutions resulted in mGAPDH\_LNA1189 versions with different calculated  $T_m$ s. As displayed in Figure 9, *in vitro* toxicity of the parent mGAPDH\_LNA1189 was gradually reduced by reducing its binding affinity.

### Hepatotoxic LNA-ASOs Also Induce Apoptosis in Tumor-Derived Human Tissue Culture Cell Lines

Finally, we investigated whether the toxic effect of LNA-ASOs, which was initially demonstrated *in vivo*,<sup>6</sup> and which could here also be demonstrated *in vitro* in mouse fibroblast cells, can also be observed in human cells. To address this, toxic LNA41 and LNA43 and well-tolerated LNA32 and LNA33, respectively, were transfected into different human cell lines, and caspase activity was assessed 24 hr later. The difference in toxicity among the LNA-ASOs observed in mouse fibroblast cells was recapitulated (compare with Figure 1) in tumor-derived human cell lines, including HeLa, HepG2, and A549 cells (Figure 10).

## DISCUSSION

Current research has greatly improved our understanding of the potential mechanisms of ASO-induced liver toxicity. Convincing *in vivo* evidence now suggests that RNase-H1-mediated cleavage of

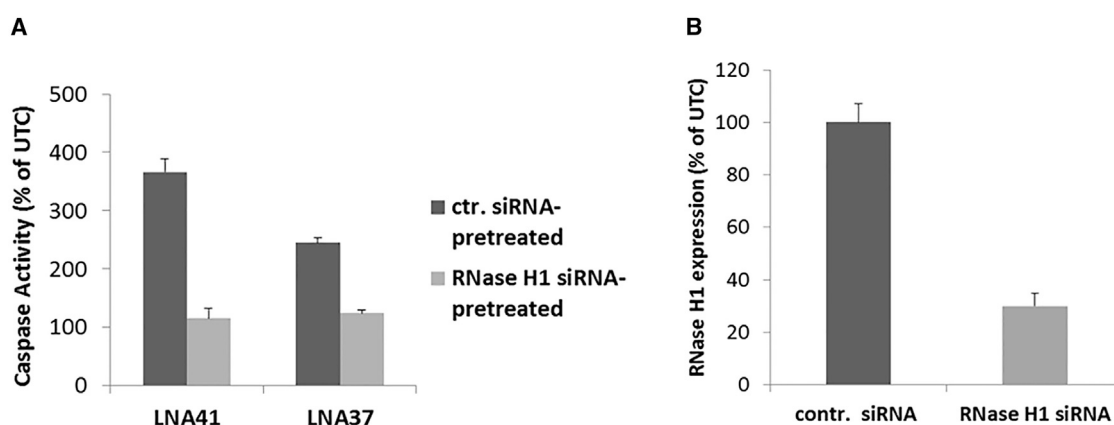

**Figure 3. RNase H1 Knockdown Suppresses LNA-ASO Toxicity *In Vitro***

(A) Mouse 3T3 fibroblast cells were transfected with a siRNA against RNase H1 (light gray bars) and a control (ctr.) siRNA (dark gray bars) at 10 nM, respectively, using Lipofectamine 2000. 24 hr later, cells were transfected with the hepatotoxic LNA41 or LNA37 at 30 nM using Lipofectamine 2000. Caspase 3/7 activity was measured 24 hr later. (B) siRNA transfection was performed as in (A) and cells were harvested 48 hr later for assessing RNase H1 knockdown by qPCR. Results in (A) and (B) are shown as a percentage change relative to UTCs. Data ( $n = 3$ ) are mean  $\pm$  SD.

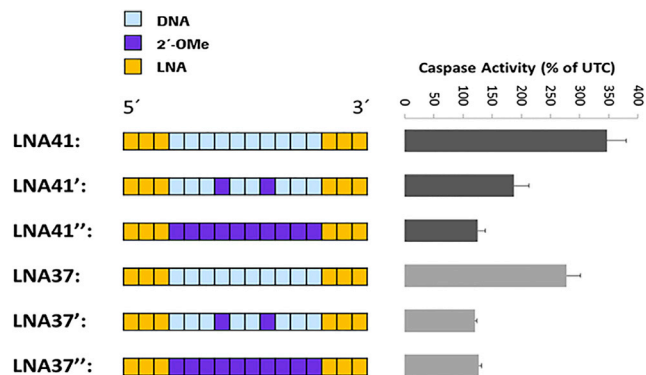

**Figure 4. 2'-OMe Modifications in the Gap Region of Hepatotoxic LNA-ASOs Suppress Toxicity *In Vitro***

Left: schematic illustration of the parent LNA41 and LNA37 ASOs and their 2'-OMe-modified versions LNA41' and LNA37' (with two 2'-OMe-modifications in the gap region) and LNA41'' and LNA37'' (with ten 2'-OMe modifications in the gap region). Right: caspase activity measured 24 hr after transfection of mouse 3T3 fibroblast cells with the indicated LNA-ASOs at 30 nM. Results are shown as a percentage change relative to UTCs. Data (n = 3) are mean  $\pm$  SD.

off-target RNAs represents an important mechanistic cause underlying ASO-mediated hepatotoxicity.<sup>10,12</sup> Until recently, *in vivo* testing of ASOs was the only way to assess the hepatotoxic potential of ASOs. Sewing et al.,<sup>14</sup> however, has now demonstrated that the hepatotoxic potential of LNA-ASOs can be assessed *in vitro* employing unassisted (gymnotic) delivery of LNA-ASOs into primary mouse and human hepatocytes.

Here, we investigated whether we can use conventional tissue culture cells and transfection methods to also assess the hepatotoxic potential of LNA-ASOs. Remarkably, when 236 different LNA-ASOs (targeting 13 different gene transcripts) with known hepatotoxic potential were lipotransfected into mouse 3T3 fibroblast cells, a significantly higher apoptosis induction was measured for hepatotoxic LNA-ASOs compared to well-tolerated LNA-ASOs (Figure 2). Moreover, in accordance with recently published *in vivo* data,<sup>10–13</sup> our subsequent *in vitro* investigations further support the crucial role of RNase H1 activity (Figures 3 and 4), the relation to the number of downregulated genes (Figure 6A), and the impact of binding affinity ( $T_m$ ) on LNA-ASO toxicity (Figures 7, 8, and 9). The concordance between the present *in vitro* data and the *in vivo* findings supports the *in vitro* screening approach for the assessment of the hepatotoxic potential of ASOs and suggests that the molecular mechanisms underlying LNA-ASO toxicity *in vivo* and *in vitro* are similar.

Previous data indicated that liver injury induced by certain LNA-ASOs in mice occurs through initiation of apoptosis in hepatocytes, and depending on the hepatotoxic potential of the LNA-ASO, can be detected as early as 24 hr after administration.<sup>9</sup> Accordingly, our *in vitro* data show apoptosis induction by hepatotoxic LNA-ASOs 24 hr after assisted delivery. In particular, we found that a selected toxic LNA-ASO induced apoptosis-associated stress response genes, including *Bcl2l11*,<sup>17</sup> *Gadd45a*,<sup>18</sup> *Trp53inp1*,<sup>19</sup> and *Cdkn1a*,<sup>20</sup> already

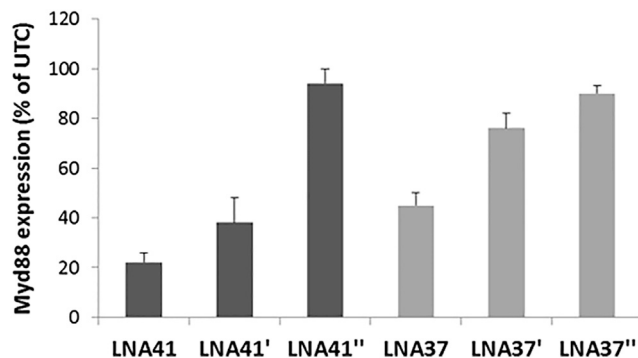

**Figure 5. 2'-OMe Modifications in the Gap Region of Hepatotoxic LNA-ASOs Suppress Downregulation of Their Intended Target**

*Myd88* expression was determined 24 hr after transfection of mouse 3T3 fibroblast cells with the indicated LNA-ASOs at 30 nM. Results are shown as a percentage change relative to UTCs. Data (n = 3) are mean  $\pm$  SD.

3–6 hr after transfection (Table S2). The rapid induction of an apoptosis-related signal suggests that the initial trigger of oligonucleotide-induced toxicity may be more closely linked to the intrinsic RNA cleavage events than generally assumed.<sup>10–12</sup> Supporting this notion are previous *in vivo* data demonstrating a rapid induction of stress response signals already 8 hr following administration of a hepatotoxic LNA-ASO into mice.<sup>5</sup> In this study, a hepatotoxic LNA-ASO induced many gene and pathway changes associated with DNA replication, cell cycle, cell death, cell growth, and proliferation in the liver of mice. Preliminary phosphoproteome analyses performed in our lab demonstrated distinct stress-related phosphorylation signals already 1 hr after transfection of a hepatotoxic but not of a well-tolerated LNA-ASO *in vitro* (A.D., unpublished data). Together, these early stress signals suggest that the trigger of oligonucleotide-induced toxicity may be closely linked to intrinsic RNA cleavage events and not necessarily to downregulation of a specific transcript or set of transcripts. Therefore, we hypothesize that ASO-induced toxicity is primarily related to the amount of RNA cleavage ( $\approx$  RNA damage), which may also explain the correlation observed *in vivo*<sup>10,11</sup> and the association demonstrated here (Figure 6A) between LNA-ASO toxicity and the number of downregulated ( $\approx$  cleaved/damaged) transcripts. Moreover, this hypothesized mechanism may also explain why, so far, no biological pathways could be identified that are commonly downregulated by hepatotoxic ASOs.<sup>5,10,11</sup>

Recently, it has been demonstrated that RNA cleavage products generated by ASOs are processed by the RNA surveillance machinery.<sup>23</sup> Eukaryotes have evolved RNA surveillance mechanisms to monitor RNA quality and rapidly respond to and eliminate faulty transcripts. This essential process prevents the accumulation of defective proteins and acts as a quality control filter to both uphold fidelity and fine-tune gene expression.<sup>24,25</sup> It is tempting to speculate that toxicity observed for some high-affinity LNA-SSOs might be related to the amount of ASO-generated RNA fragments sequestering or activating factors crucial for maintaining the quality of the RNA surveillance process. The gradual sequestering (or activation) of these factors

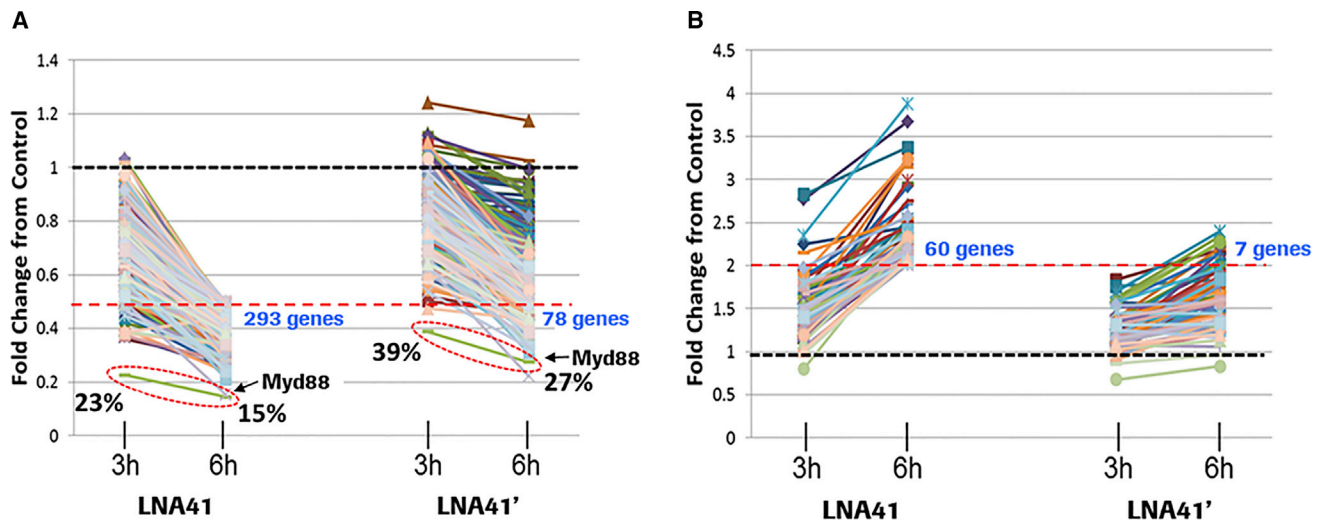

**Figure 6. Effect of Hepatotoxic LNA41 and Its 2'-OMe-Gap-Modified Version LNA41' on Gene Expression in Mouse Fibroblast Cells**

Mouse 3T3 fibroblast cells were transfected with LNA41 and 2'-OMe-modified LNA41', respectively, at 30 nM in triplicates, and were then harvested at 3 and 6 hr, respectively. Gene array analysis was performed and only genes were considered, which were significantly ( $p$  value  $\leq 0.01$ ) de-regulated by at least 2-fold (indicated by the dashed red lines; number of respective genes identified are in blue) from the untreated control (dashed black lines) at the 6-hr time point for LNA41. (A) shows the downregulatory trends of the identified genes between 3 and 6 hr after transfection. The red dashed oval and the arrow indicate the downregulation trends for the LNA41 target transcript *Myd88*; the remaining *Myd88* transcript levels are indicated as fold change relative to control. (B) shows the upregulatory trends of the identified genes between 3 and 6 hr after transfection.

may act as a measure of RNA cleavage: once a certain fraction of these factors is sequestered (or activated), apoptosis may be induced. However, whether this hypothesized mechanism explains how cells sense and respond to exaggerated oligonucleotide-mediated RNA cleavage must be further investigated. Obviously, a large amount of RNA

cleavage events induced by some ASOs might also increase the probability of hitting essential genes so that the mechanism(s) of toxicity can be expected to be a combination of RNA damage and ASO-specific silencing of essential genes (potentially explaining the outliers found in our study).

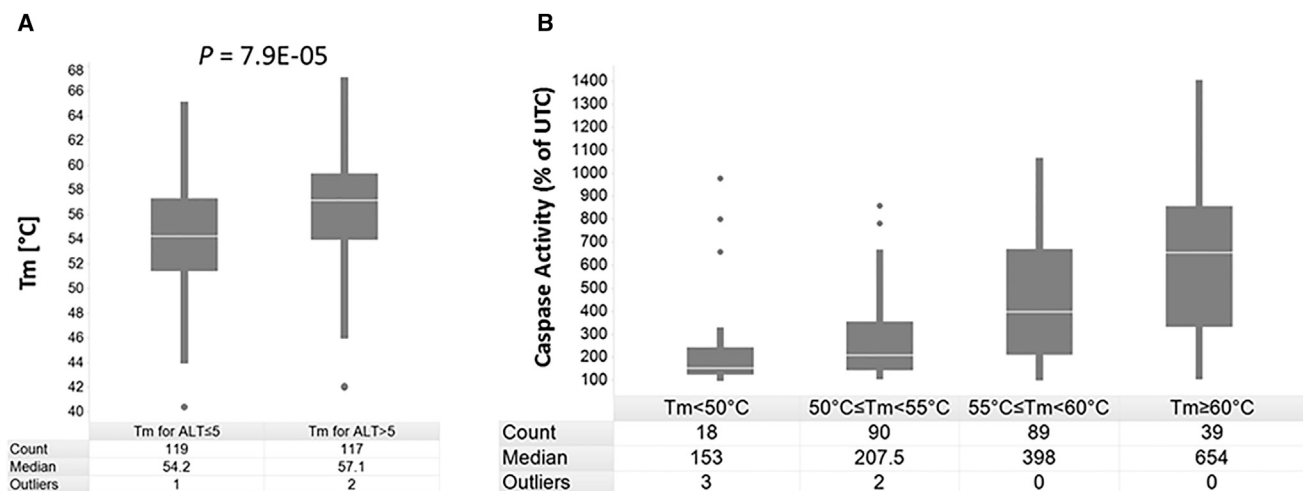

**Figure 7. Higher Affinity LNA-ASOs Tend to Be More Toxic *In Vitro* and *In Vivo***

(A) The 236 LNA-ASOs were separated into two groups with *in vivo* mean ALT levels  $\leq 5$ -fold and  $>5$ -fold from saline-treated mice, respectively. For each group, the respective theoretical  $T_m$  values were calculated and summarized in a boxplot diagram. (B) The 236 LNA-ASOs were separated into four  $T_m$  ranges, as indicated. For each  $T_m$  range, the oligonucleotides' respective caspase values were listed in a boxplot diagram. In addition, for each group in (A) and (B) the number (count) of included LNA-ASOs, the median  $T_m$  (for A) and caspase (for B) values, and the number of outliers are shown. The level of significance as evaluated by Wilcoxon rank sum test is indicated above the boxplots in (A).

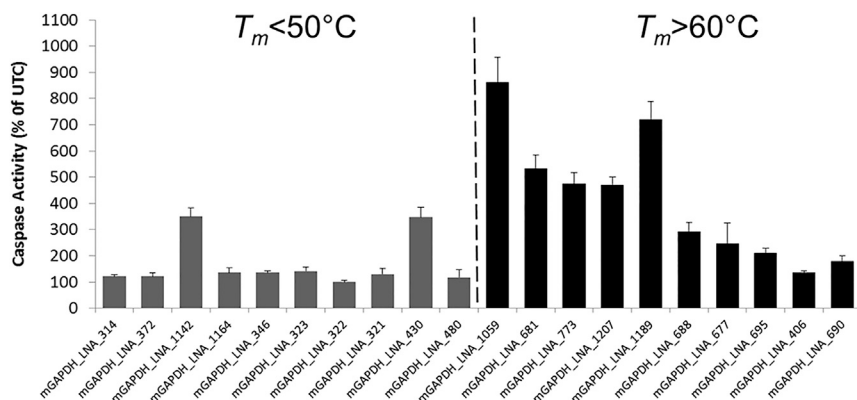

**Figure 8. Melting Temperature,  $T_m$ , Calculations Facilitate the Design of LNA-ASOs with Low Toxic Potential**

Mouse 3T3 fibroblast cells were transfected using Lipofectamine 2000 with ten low-binding affinity ( $T_m < 50^\circ\text{C}$ ; dark gray bars) and ten high-binding affinity ( $T_m > 60^\circ\text{C}$ ; black bars) LNA-ASOs targeting mouse *Gapdh*, respectively, at 30 nM. Caspase 3/7 activity was measured 24 hr later. Results are shown as a percentage change relative to UTCs. Data ( $n = 3$ ) are mean  $\pm$  SD.

Of particular note, apoptosis induction by RNA cleavage is also considered to be the underlying cause of cytotoxicity observed for certain ribonucleases.<sup>26</sup> Remarkably, we found that selected hepatotoxic LNA-ASOs, similar to cytotoxic ribonucleases,<sup>26</sup> exerted their toxic potential in cells derived from tumors of different origin(s), including HepG2, HeLa, and A549 cells (Figure 10). Although the precise mechanisms leading to apoptosis induction by cytotoxic RNases are not yet fully understood, it is possible that exaggerated off-target RNA cleavage mediated by certain high-affinity ASOs trigger similar mechanisms.

Our data suggest a general cytotoxic—rather than a cell-type-specific toxic—effect of ASOs with observed hepatotoxicity. This may be expected because the high number of downregulated off-targets by an ASO with high binding affinity is likely similar in different cell types and species. In agreement with previous *in vivo* studies,<sup>10,12</sup> our data suggest that the binding affinity of an LNA-ASO is a major determinant for hybridization-dependent toxicity (Figures 7, 8, and 9). Moreover, our data also suggest that LNA-ASOs with a calculated  $T_m < 55^\circ\text{C}$  have a likely lower hepatotoxic potential than LNA-ASOs with a higher  $T_m$  (as suggested by the threshold of  $T_m \approx 55^\circ\text{C}$ , which seems to roughly separate hepatotoxic from non-hepatotoxic LNA-ASOs; Figure 7A). Such an affinity threshold above which toxicity seems to increase suggests that the cells can potentially tolerate RNA cleavage events to a certain degree before inducing apoptosis. The number of gross RNA cleavage events mediated by LNA-ASOs with a  $T_m < 55^\circ\text{C}$  may fall more frequently into the tolerable range than the number induced by LNA-ASOs with a  $T_m \geq 55^\circ\text{C}$ .

One might reason that LNA-ASOs with a lower  $T_m$  are less potent than LNA-ASOs with a higher  $T_m$ . However, as recently demonstrated, too high a binding affinity of an ASO to its target can also reduce its potency, suggesting that an optimal affinity exists that is dependent on various target and cellular factors.<sup>26</sup> We found that for gapmer LNA-ASOs, which are 16 nt long, a predicted  $T_m$  between  $50^\circ\text{C}$  and  $55^\circ\text{C}$  is within a range that roughly balances potency toward the intended target versus the hybridization-dependent toxic potential associated with the binding to unintended targets.

*In silico* methods can identify putative off-target sequences, making them an invaluable tool for designing oligonucleotide-based compounds. However, most of the predicted off-target sequences are not confirmed *in vivo* or *in vitro*.<sup>11,13,16</sup> We here present an example illustrating the shortcoming of *in silico* off-target predictions, solely relying on identifying interactions based on sequence complementarity. In this example, four LNA-ASOs (the four different mGAPDH\_LNA1189 wing design variants; Figure 9) had the same sequence but different numbers of LNA modifications in the wings, resulting in different calculated  $T_m$ s. In terms of sequence complementarity, *in silico* approaches would predict the same number and identity of potential off-target sequences for these four LNA-ASOs and, hence, the same off-target-related toxic potential. However, our *in vitro* assessment of these oligonucleotides suggests that the various LNA wing design variants of mGAPDH\_LNA1189 affect their common off-targets differently, causing differing grades of toxicity *in vitro* (Figure 9). A plausible explanation, which follows previous findings,<sup>13</sup> is that the lower affinity mGAPDH\_LNA1189 variants will stably bind to and cleave fewer predicted off-target sequences with partial mismatches than the higher affinity variants. Of interest, an implementation of our  $T_m < 55^\circ\text{C}$  threshold into the design of these LNA-ASOs would have selected the well-tolerated

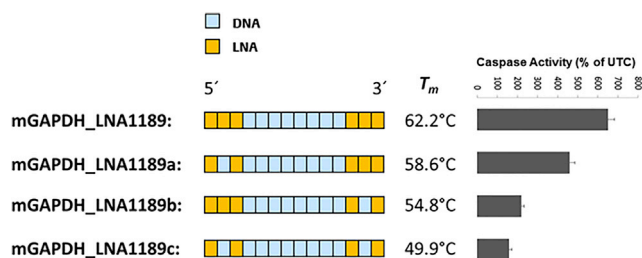

**Figure 9. Effect of the Wing Design on Binding Affinity and LNA-SSO Toxicity**

Left: schematic illustration of the parent mGAPDH\_LNA1189 and its DNA-substituted wing variants with their respective calculated  $T_m$ s. Right: caspase activity measured 24 hr after transfection of mouse 3T3 fibroblast cells with the indicated LNA-ASOs at 30 nM. Results are shown as a percentage change relative to UTCs. Data ( $n = 3$ ) are mean  $\pm$  SD.

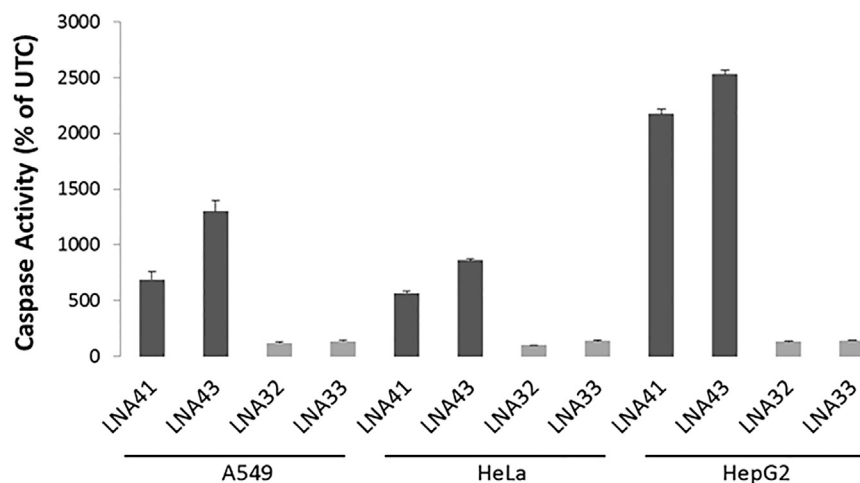

**Figure 10. Selected Hepatotoxic LNA-ASOs Also Exert Their Toxic Potential in Different Human Tumor Cells**

A549, HeLa, and HepG2 cells were transfected using Lipofectamine 2000 with the well-tolerated LNA32 and LNA33 (light gray bars) and the hepatotoxic LNA41 and LNA43 (dark gray bars), respectively, at 30 nM. Caspase 3/7 activity was measured 24 hr later. Triplicate transfections were performed, and the results are shown as a percentage change relative to UTCs. Data are mean  $\pm$  SD.

versions while filtering out the more toxic versions. Finally, this example also supports using high-affinity modifications in the wings of ASOs because variations of their number and position in the wings allow fine-tuning of the binding affinity for optimally designed ASO molecules. However, a reduction of the  $T_m$  (by, e.g., reducing the LNA content in the wings) of a given potent, but toxic, LNA-ASO should not be considered as a general strategy to reduce the LNA-ASO's toxic liability because the affinity reduction will likely also reduce its potency. We instead suggest designing LNA-ASOs with a "moderate"  $T_m$  (e.g., between 50°C and 55°C, as suggested by our data) and testing these oligonucleotides for efficacy.

Our data suggest that substitution of a few unmodified DNA nucleotides in the gap region with, e.g., 2'-OMe modifications, might also reduce the toxic potential of LNA-ASOs (Figure 4). Although 2'-OMe modifications increase the  $T_m$  of an ASO and potentially its potency when located in the wings, their positioning and content in the gap region can interfere with RNase H1 activity.<sup>27</sup> Hence, 2'-OMe gap modifications can reduce the ASO's on- and off-target cleavage potential, which likely also reduces the hybridization-dependent toxic potential observed in the present study (Figure 4). However, our data suggest that depending on the LNA-ASO sequence, slight 2'-OMe gap modifications could have a different impact on the on-target compared to the off-target sites (Figures 5 and 6A). Further investigation is required to understand how widely the gap modification approach can be used to reduce off-target effects while at the same time retaining activity on the intended target.

We acknowledge that ASOs may also cause non-hybridization-related toxicities and that the overall number and expression of potential off-targets for a given ASO and consequently the hybridization-related toxicities likely vary between cell types. This is reflected in the differing sensitivity of the three cell lines tested (Figure 10). To broadly explore the hybridization-dependent toxic potential of ASOs, we propose to include a set of different human cell types for assessment and propose

to consider only those ASOs for further development, which will demonstrate the lowest apoptosis score in all cell types tested. In our hands, caspase 3/7 values <200% of the level found in untreated cells may indicate low, hybridization-related oligonucleotide toxicity

(as suggested by Figure 2). Additional transcriptome and pathway analyses implemented in *in vitro* and in animal studies will help to prioritize LNA-ASOs for further development.<sup>11</sup>

Overall, our finding of a  $T_m < 55^\circ\text{C}$  threshold level for LNA-ASO toxicity has the potential to improve the design of well-tolerated and efficacious molecules. Moreover, our *in vitro* screening approach represents a valuable addition to the set of *in vitro* assays that can identify and deselect ASOs with potential toxicity liabilities,<sup>11,14,15</sup> further improving the discovery of safer ASO drugs.

## MATERIALS AND METHODS

### Cell Culture

Mouse 3T3 cells were cultured in DMEM, A549 cells were cultured in Ham's F12K medium, and HeLa and HepG2 cells were cultured in MEM. All media were supplemented with 10% (v/v) fetal bovine serum. Cells were cultured at 37°C and 5% CO<sub>2</sub>.

### Oligonucleotides and Transfection

All LNA-ASOs and derivatives listed in detail in Figures 4 and 9 and Tables 1 and S1 were derived from Exiqon (Denmark). siRNAs, including control siRNA (#1027280) and mouse RNase H1 siRNA (#1027416), were purchased from QIAGEN. 1 day before transfection, cells were plated in 100  $\mu\text{L}$  growth medium without antibiotics in a 96-well plate at a density that resulted in 60%–70% cell confluency at the time of transfection. Lipofectamine 2000 (Invitrogen) was used for transfections in 96-well plates. Oligonucleotides or siRNAs were diluted to the required concentration to a total volume of 25  $\mu\text{L}$  in Opti-MEM (Invitrogen) and mixed with 25  $\mu\text{L}$  transfection complex (0.25  $\mu\text{L}$  Lipofectamine 2000 and 24.75  $\mu\text{L}$  Opti-MEM). After 20 min incubation, 50  $\mu\text{L}$  antibiotic-free medium was added to the solution and mixed. After removing the medium from the wells, 100  $\mu\text{L}$  oligonucleotide:transfection agent solution was added to the cells and incubated for 24 hr (LNA-ASO transfections) or 48 hr (siRNA transfections), respectively. All transfections were performed in triplicates.



### Apoptosis Assay

Caspase-3/7 activity was determined 24 hr after oligonucleotide transfection using the Caspase-Glo 3/7 Assay (Promega) according to the manufacturer's instruction on a VICTOR3 plate reader (Perkin Elmer).

### RNA Preparation and qPCR Experiments

mRNA purification from mouse 3T3 cells was performed using the RNeasy Mini Kit (#74104; QIAGEN), including an RNase-free DNase I treatment according to the manufacturer's instructions. 50 ng RNA were used per sample, and a one-step RT-PCR was performed using the LightCycler Multiplex RNA Virus Master Kit (#06754155001; Roche) according to the manufacturer's protocol for a LightCycler 96 (Roche Diagnostics). The primer probes for mouse *Myd88*, *RNase H1*, and *GAPDH* were Mm00440338\_m1, Mm00488036\_m1, and Mm99999915\_g1 (all from Thermo Fisher Scientific), respectively. Analysis was done by the  $\Delta\Delta C_t$  threshold method to determine expression relative to *GAPDH* mRNA. Each analysis reaction was performed in triplicates, with three samples per condition.

### RNA Preparation and Microarray Experiments

mRNA purification from mouse 3T3 cells was performed using the RNeasy 96 Kit (QIAGEN), including an RNase-free DNase I treatment, according to the manufacturer's instructions. The mouse WG-6 v2 Expression BeadChip (Illumina) was processed in accordance with the manufacturer's instructions. 750 ng total RNA were used for cRNA *in vitro* transcription and labeling with the Illumina TotalPrep RNA Amplification Kit (Life Technologies). Hybridization was carried out in accordance with the Illumina Hybridization System Manual, and data analysis was performed as described previously.<sup>28</sup>

### $T_m$ Calculations

A nearest-neighbor model was used to calculate theoretical  $T_m$  of the LNA-ASOs binding to RNA, as previously described.<sup>22</sup> The nearest-neighbor model combines published thermodynamic parameters for LNA binding to DNA with parameters for DNA binding to RNA, and was validated on experimentally measured  $T_m$  for LNA-ASOs binding to RNA.<sup>22</sup>

### Statistical Analysis

The data of experiments are expressed as the mean  $\pm$  SD. Comparisons of data between two groups were analyzed with the Kolmogorov-Smirnov test and Wilcoxon rank sum.

### SUPPLEMENTAL INFORMATION

Supplemental Information includes two tables and can be found with this article online at <https://doi.org/10.1016/j.omtn.2017.11.004>.

### AUTHOR CONTRIBUTIONS

A.D. conceived the study, supervised the experiments, and wrote the manuscript; P.H.H. coordinated and analyzed the transfection of 236 LNA-ASOs into 3T3 cells and co-wrote the manuscript; Y.B. and C.B. performed the experiments; M.B. performed the data analysis; M.E., T.S., and F.S. revised and approved the manuscript.

### CONFLICTS OF INTEREST

All authors are employees of F. Hoffmann-La Roche. The funder provided support in the form of salaries for authors but did not have any additional role in the study design, data collection and analysis, decision to publish, or preparation of the manuscript.

### ACKNOWLEDGMENTS

The authors thank Marianne Rudolph Hanson and Jon Bodnar for critically reading the manuscript, and Ulrich Certa, Erich Koller, Kevin Brady, Adrian Roth, Annie Moisan, and Sabine Sewing for insightful discussions.

### REFERENCES

1. Khvorova, A., and Watts, J.K. (2017). The chemical evolution of oligonucleotide therapies of clinical utility. *Nat. Biotechnol.* 35, 238–248.
2. Chi, X., Gatti, P., and Papoian, T. (2017). Safety of antisense oligonucleotide and siRNA-based therapeutics. *Drug Discov. Today* 22, 823–833.
3. Frazier, K.S. (2015). Antisense oligonucleotide therapies: the promise and the challenges from a toxicologic pathologist's perspective. *Toxicol. Pathol.* 43, 78–89.
4. Swayze, E.E., Siwkowski, A.M., Wancewicz, E.V., Migawa, M.T., Wyrzykiewicz, T.K., Hung, G., Monia, B.P., and Bennett, C.F. (2007). Antisense oligonucleotides containing locked nucleic acid improve potency but cause significant hepatotoxicity in animals. *Nucleic Acids Res.* 35, 687–700.
5. Kakiuchi-Kiyota, S., Koza-Taylor, P.H., Mantena, S.R., Nelms, L.F., Enayetallah, A.E., Hollingshead, B.D., Burdick, A.D., Reed, L.A., Warneke, J.A., Whiteley, L.O., et al. (2014). Comparison of hepatic transcription profiles of locked ribonucleic acid antisense oligonucleotides: evidence of distinct pathways contributing to non-target mediated toxicity in mice. *Toxicol. Sci.* 138, 234–248.
6. Hagedorn, P.H., Yakimov, V., Ottosen, S., Kammler, S., Nielsen, N.F., Hög, A.M., Hedtjärn, M., Meldgaard, M., Møller, M.R., Orum, H., et al. (2013). Hepatotoxic potential of therapeutic oligonucleotides can be predicted from their sequence and modification pattern. *Nucleic Acid Ther.* 23, 302–310.
7. Seth, P.P., Jazayeri, A., Yu, J., Allerson, C.R., Bhat, B., and Swayze, E.E. (2012). Structure activity relationships of  $\alpha$ -L-LNA modified phosphorothioate gapmer antisense oligonucleotides in animals. *Mol. Ther. Nucleic Acids* 1, e47.
8. Stanton, R., Sciabola, S., Salatto, C., Weng, Y., Moshinsky, D., Little, J., Walters, E., Kreeger, J., DiMattia, D., Chen, T., et al. (2012). Chemical modification study of antisense gapmers. *Nucleic Acid Ther.* 22, 344–359.
9. Burdick, A.D., Sciabola, S., Mantena, S.R., Hollingshead, B.D., Stanton, R., Warneke, J.A., Zeng, M., Martsen, E., Medvedev, A., Makarov, S.S., et al. (2014). Sequence motifs associated with hepatotoxicity of locked nucleic acid–modified antisense oligonucleotides. *Nucleic Acids Res.* 42, 4882–4891.
10. Burel, S.A., Hart, C.E., Cauntay, P., Hsiao, J., Machemer, T., Katz, M., Watt, A., Bui, H.H., Younis, H., Sabripour, M., et al. (2016). Hepatotoxicity of high affinity gapmer antisense oligonucleotides is mediated by RNase H1 dependent promiscuous reduction of very long pre-mRNA transcripts. *Nucleic Acids Res.* 44, 2093–2109.
11. Kamola, P.J., Maratou, K., Wilson, P.A., Rush, K., Mullaney, T., McKevitt, T., Evans, P., Ridings, J., Chowdhury, P., Roulois, A., et al. (2017). Strategies for *in vivo* screening and mitigation of hepatotoxicity associated with antisense drugs. *Mol. Ther. Nucleic Acids* 8, 383–394.
12. Kasuya, T., Hori, S., Watanabe, A., Nakajima, M., Gahara, Y., Rokushima, M., Yanagimoto, T., and Kugimiya, A. (2016). Ribonuclease H1-dependent hepatotoxicity caused by locked nucleic acid–modified gapmer antisense oligonucleotides. *Sci. Rep.* 6, 30377.
13. Kamola, P.J., Kitson, J.D., Turner, G., Maratou, K., Eriksson, S., Panjwani, A., Warnock, L.C., Douillard Guilloux, G.A., Moores, K., Koppe, E.L., et al. (2015). *In silico* and *in vitro* evaluation of exonic and intronic off-target effects form a critical element of therapeutic ASO gapmer optimization. *Nucleic Acids Res.* 43, 8638–8650.

14. Sewing, S., Boess, F., Moisan, A., Bertinetti-Lapatki, C., Minz, T., Hedtjaern, M., Tessier, Y., Schuler, F., Singer, T., and Roth, A.B. (2016). Establishment of a predictive in vitro assay for assessment of the hepatotoxic potential of oligonucleotide drugs. *PLoS One* *11*, e0159431.
15. Moisan, A., Gubler, M., Zhang, J.D., Tessier, Y., Dumong Erichsen, K., Sewing, S., Gérard, R., Avignon, B., Huber, S., Benmansour, F., et al. (2017). Inhibition of EGF uptake by nephrotoxic antisense drugs in vitro and implications for preclinical safety profiling. *Mol. Ther. Nucleic Acids* *6*, 89–105.
16. Hagedorn, P.H., Hansen, B.R., Koch, T., and Lindow, M. (2017). Managing the sequence-specificity of antisense oligonucleotides in drug discovery. *Nucleic Acids Res.* *45*, 2262–2282.
17. O'Connor, L., Strasser, A., O'Reilly, L.A., Hausmann, G., Adams, J.M., Cory, S., and Huang, D.C. (1998). Bim: a novel member of the Bcl-2 family that promotes apoptosis. *EMBO J.* *17*, 384–395.
18. Takekawa, M., and Saito, H. (1998). A family of stress-inducible GADD45-like proteins mediate activation of the stress-responsive MTK1/MEKK4 MAPKKK. *Cell* *95*, 521–530.
19. Okamura, S., Arakawa, H., Tanaka, T., Nakanishi, H., Ng, C.C., Taya, Y., Monden, M., and Nakamura, Y. (2001). p53DINP1, a p53-inducible gene, regulates p53-dependent apoptosis. *Mol. Cell* *8*, 85–94.
20. Gartel, A.L., and Tyner, A.L. (2002). The role of the cyclin-dependent kinase inhibitor p21 in apoptosis. *Mol. Cancer Ther.* *1*, 639–649.
21. You, Y., Tataurov, A.V., and Owczarzy, R. (2011). Measuring thermodynamic details of DNA hybridization using fluorescence. *Biopolymers* *95*, 472–486.
22. Pedersen, L., Hagedorn, P.H., Lindholm, M.W., and Lindow, M. (2014). A kinetic model explains why shorter and less affine enzyme-recruiting oligonucleotides can be more potent. *Mol. Ther. Nucleic Acids* *3*, e149.
23. Lima, W.F., De Hoyos, C.L., Liang, X.H., and Crooke, S.T. (2016). RNA cleavage products generated by antisense oligonucleotides and siRNAs are processed by the RNA surveillance machinery. *Nucleic Acids Res.* *44*, 3351–3363.
24. Houseley, J., LaCava, J., and Tollervy, D. (2006). RNA-quality control by the exosome. *Nat. Rev. Mol. Cell Biol.* *7*, 529–539.
25. Lykke-Andersen, J., and Bennett, E.J. (2014). Protecting the proteome: eukaryotic co-translational quality control pathways. *J. Cell Biol.* *204*, 467–476.
26. Fang, E.F., and Ng, T.B. (2011). Ribonucleases of different origins with a wide spectrum of medicinal applications. *Biochim. Biophys. Acta* *1815*, 65–74.
27. Monia, B.P., Lesnik, E.A., Gonzalez, C., Lima, W.F., McGee, D., Guinosso, C.J., Kawasaki, A.M., Cook, P.D., and Freier, S.M. (1993). Evaluation of 2'-modified oligonucleotides containing 2'-deoxy gaps as antisense inhibitors of gene expression. *J. Biol. Chem.* *268*, 14514–14522.
28. Zhang, J.D., Berntsen, N., Roth, A., and Ebeling, M. (2014). Data mining reveals a network of early-response genes as a consensus signature of drug-induced in vitro and in vivo toxicity. *Pharmacogenomics J.* *14*, 208–216.

OMTN, Volume 10

## Supplemental Information

### **A Sensitive *In Vitro* Approach to Assess the Hybridization-Dependent Toxic Potential of High Affinity Gapmer Oligonucleotides**

**Andreas Dieckmann, Peter H. Hagedorn, Yvonne Burki, Christine Brüggmann, Marco Berrera, Martin Ebeling, Thomas Singer, and Franz Schuler**

## SUPPLEMENTARY DATA

| LNA-SSO name    | LNA-SSO sequence | Target RNA | $T_m$ [°C] |
|-----------------|------------------|------------|------------|
| mGAPDH_LNA_677  | GCAGgatgcatTGC   | mGapdh     | 62.2       |
| mGAPDH_LNA_1059 | GGTcctcagtgTAG   | mGapdh     | 61.4       |
| mGAPDH_LNA_688  | CAGTtggtggtGCA   | mGapdh     | 60.5       |
| mGAPDH_LNA_695  | GGCtaagcagtTGG   | mGapdh     | 62.4       |
| mGAPDH_LNA_1207 | GCCatgaggtcCAC   | mGapdh     | 61.2       |
| mGAPDH_LNA_406  | GCCTtgactgtGCC   | mGapdh     | 66.2       |
| mGAPDH_LNA_681  | TGGtgcaggatGCA   | mGapdh     | 60.9       |
| mGAPDH_LNA_690  | AGCagttggtgGTG   | mGapdh     | 61.4       |
| mGAPDH_LNA_773  | GGTggcagtgaTGG   | mGapdh     | 61.1       |
| mGAPDH_LNA_1189 | CTGttgctgtaGCC   | mGapdh     | 62.2       |
| mGAPDH_LNA_314  | AACaatctccaCTT   | mGapdh     | 45.4       |
| mGAPDH_LNA_236  | GTTgatggcaaCAA   | mGapdh     | 47.2       |
| mGAPDH_LNA_346  | TAGttgaggtcAAT   | mGapdh     | 47.2       |
| mGAPDH_LNA_372  | AGTcatactggAAC   | mGapdh     | 47.2       |
| mGAPDH_LNA_480  | ATTtgatgtaGTG    | mGapdh     | 46.9       |
| mGAPDH_LNA_321  | TGAtggcaacaATC   | mGapdh     | 47.6       |
| mGAPDH_LNA_430  | TTGatgacaagCTT   | mGapdh     | 47.2       |
| mGAPDH_LNA_1142 | AAAgttgtcatTGA   | mGapdh     | 45.1       |
| mGAPDH_LNA_1164 | CATaccaggaaATG   | mGapdh     | 46.1       |
| mGAPDH_LNA_236  | GTTgatggcaaCAA   | mGapdh     | 47.2       |

**Table S1:** Summary of LNA-SSOs with different  $T_m$ s targeting mouse Gapdh. Capital letters: LNA; small letters: DNA; all LNA-SSOs were fully phosphorothioated. The theoretically calculated melting temperatures ( $T_m$ s) are indicated.

| <b>Genes up-regulated<br/>six hours after<br/>transfection of<br/>LNA41</b> |
|-----------------------------------------------------------------------------|
| 1500004F05Rik                                                               |
| 1500005K14Rik                                                               |
| 2010004M13Rik                                                               |
| 2310040B03Rik                                                               |
| 2610019E17Rik                                                               |
| 2810001G20Rik                                                               |
| 2810017I02Rik                                                               |
| 3010015K02Rik                                                               |
| 4632428D17Rik                                                               |
| 4930563B10Rik                                                               |
| 4930572J05Rik                                                               |
| 4933428A15Rik                                                               |
| 4933431K14Rik                                                               |
| 5033430I15Rik                                                               |
| 5330438D12Rik                                                               |
| 6720475J19Rik                                                               |
| A730063M14Rik                                                               |
| Ahnak2                                                                      |
| Ak3l1                                                                       |
| Anapc4                                                                      |
| B430105G09Rik                                                               |
| B930041F14Rik                                                               |
| BC023892                                                                    |
| Bcl2l11                                                                     |
| Bcl9l                                                                       |
| Cbx2                                                                        |
| Cdkn1a                                                                      |
| Cnot2                                                                       |
| D0H4S114                                                                    |
| Ddit4l                                                                      |
| Ddx49                                                                       |
| En1                                                                         |
| Fez1                                                                        |
| Foxq1                                                                       |
| Fubp1                                                                       |
| Fzd2                                                                        |
| Gadd45a                                                                     |
| Gnpda1                                                                      |
| H2afj                                                                       |
| Hexim1                                                                      |

|              |
|--------------|
| Htra3        |
| Ints5        |
| Krt10        |
| LOC100045678 |
| Mmab         |
| Msx1         |
| Osr2         |
| Pcyox11      |
| Pias3        |
| Ppapdc2      |
| Ptp4a1       |
| Pthr2        |
| Rap2a        |
| Rhou         |
| Slc46a3      |
| Snhg10       |
| Stag2        |
| Tmem158      |
| Trp53inp1    |
| Zadh2        |

**Table S2:** List of mouse genes significantly ( $P$ -value $\leq 0.01$ ) up-regulated by 30 nM hepatotoxic LNA41 (at least two-fold from untreated control) in mouse 3T3 cells six hours after transfection.
